# Supplementary material for: Nitrogen fertilizer application for improving the biomass, quality, and nitrogen fixation of alfalfa (Medicago sativa L.) at different growth stages in a saline‒alkali soil
Source: PeerJ. 2025 Jan 16;13:e18796. doi: 10.7717/peerj.18796 (PMC11742254; doi:10.7717/peerj.18796)
Supplement: Supplemental Information 2 [file peerj-13-18796-s002.xlsx]

## Sheet: 2_field
year	Date	treatment	cut	StageName	stem_diameter	stem_diameter_error	branchingnumber	branchingnumber_error	height	height_error	yield	yield_error	biomass	biomassError	stem_ratio	stem_error	leafN_concerntration	leafN_concerntration_error	stemN_concerntration	stemN_concerntration_error	rootN_concentration	rootN_concentration_error	shootN_concerntration	shootN_concerntration error	N_uptake	N_uptake_error	CP	CP_error	ADF	ADF_error	NDF	NDF_error	nodule_number	nodule_number_error	ndfa	ndfa_error	fix_n	fix_n_error	NEW_efficiency	NEW_efficiency_error	nh4_1	nh4_1_Error	no3_1	no3_1_Error	nh4_2	nh4_2_Error	no3_2	no3_2_Error	sws(1)
2020	2020-08-06	N0	last	end_of_juvenil	1.2	0.07	10.67	0.32	29.033	1.204	NA	NA	1468.88	105.86	0.873	0.07	5.276	0.5	2.118	0.19	2.0959	0.06	3.795	0.32	55.61	5.88	23.716	2.01	24.71	1.85	49.52	0.66	12.5	3.4	NA	NA	NA	NA			7.59	0.57	27.11	6.53	6.56	0.39	28.39	10.87	0.152
2020	2020-08-06	N1	last	end_of_juvenil	1.5	0.03	10.4	0.1	30.023	0.973	NA	NA	1502.3	147.29	0.813	0.05	6.11	0.17	2.332	0.21	2.4155	0.06	4.422	0.07	66.048	13.4	27.635	0.42	25.97	1.74	52.56	0.67	8.8	1.7	NA	NA	NA	NA			7.32	0.07	41.96	10.78	7.87	0.06	31.21	11.68	0.152
2020	2020-08-06	N2	last	end_of_juvenil	1.2	0.04	10.2	0.44	28.807	0.945	NA	NA	1442.7	119.33	0.81	0.08	5.627	0.44	2.583	0.03	2.4009	0.06	4.277	0.26	62.309	8.95	26.733	1.63	24.4	1.25	51.76	0.34	8.3	1.5	NA	NA	NA	NA			8.24	0.45	38.33	2.36	8.4	0.32	33.78	4.71	0.152
2020	2020-08-06	N3	last	end_of_juvenil	1.4	0.12	10.1	0.46	30.417	0.739	NA	NA	1687.3	158.11	0.841	0.02	6.515	0.23	2.722	0.05	2.552	0.07	4.808	0.17	80.582	5.43	30.051	1.04	23.13	0.38	49.72	1.31	3.7	2.7	NA	NA	NA	NA			8.09	1.09	59.61	8.51	9.06	1.29	68.51	4.39	0.152
2020	2020-08-06	N4	last	end_of_juvenil	1.5	0.16	9.93	0.64	30.127	1.516	NA	NA	1865	256.79	0.827	0.07	6.081	0.15	2.929	0.02	2.5395	0.17	4.659	0.09	87.26	13.21	29.119	0.56	27.27	1.44	51.26	1.47	3.2	2.4	NA	NA	NA	NA			6.75	0.62	53.91	11.93	7.61	0.3	77.4	11.04	0.152
2020	2020-08-27	N0	last	end_of_juvenil	2.1	0.17	13.73	0.37	46.933	1.964	NA	NA	2229.58	163.13	0.696	0.06	4.838	0.22	2.418	0.16	2.263	0.07	3.842	0.15	85.655	9.34	24.01	0.95	29.02	1.65	50.6207	0.30311	6.5	0.72	NA	NA	NA	NA			8.05	0.24	21.26	7.93	6.53	0.38	37.62	12.41	0.18
2020	2020-08-27	N1	last	end_of_juvenil	2.2	0.1	14.53	1.05	47.4	1.901	NA	NA	2304.34	416.06	0.719	0.04	5.717	0.09	2.517	0.03	2.336	0.06	4.38	0.04	100.943	17.59	27.378	0.24	29.71	1.4	48.393	0.652159	9.4	0.68	NA	NA	NA	NA			9.43	0.3	28.9	9.34	7.84	0.91	31.93	4.1	0.18
2020	2020-08-27	N2	last	end_of_juvenil	2.3	0.24	14.7	0.72	47.167	0.463	NA	NA	2257.64	191.95	0.625	0.02	5.777	0.2	2.475	0.23	2.391	0.09	4.508	0.16	101.782	12.07	28.177	1.02	29.48	0.71	48.7929	0.860741	12.4	4.16	NA	NA	NA	NA			7.23	0.26	21.03	2.95	7.56	0.17	51.46	21.34	0.18
2020	2020-08-27	N3	last	end_of_juvenil	2.6	0.08	15.87	0.18	49.467	2.384	NA	NA	2314.63	308.19	0.761	0.03	5.353	0.08	2.35	0.1	2.494	0.02	4.056	0.06	93.881	11.52	25.35	0.39	26.96	0.39	49.9487	0.904137	5.3	2.4	NA	NA	NA	NA			8.56	0.38	32.28	2.4	8.64	0.79	71.64	21.4	0.18
2020	2020-08-27	N4	last	end_of_juvenil	2.3	0.19	13.87	0.13	48.933	1.702	NA	NA	2408.96	176.79	0.724	0.08	5.417	0.08	2.354	0.18	2.511	0.09	4.138	0.15	99.694	4.14	25.864	0.96	26.83	0.68	48.6018	0.126662	4.2	0.51	NA	NA	NA	NA			9.99	0.64	67.01	15.89	7.76	0.68	114.21	35.56	0.18
2020	2020-10-03	N0	last	end_of_juvenil	2.88	0.2	15.67	0.41	54.407	3.461	2.88795	0.35464	2887.95	354.64	1.15	0.05	5.16	0.13	2.45	0.11	2.3	0.06	3.71	0.02	107.05	13.08	23.17	0.14	29.99	1.42	50.62	0.3	5.23	0.65	78.02	16.8	81.11	2.29	10.7	1.7	8.47	0.3	18.73	1.29	8.1	0.6	23.46	4.67	0.12
2020	2020-10-03	N1	last	end_of_juvenil	2.873	0.1	14.87	0.75	60.267	6.269	2.90784	0.05942	2907.84	59.42	1.03	0.03	5.56	0.13	2.64	0.04	2.4	0.06	4.08	0.06	118.62	3.77	25.49	0.4	31.59	1.46	48.39	0.65	10.83	1.27	60.4	16.9	72.05	12.74	4.7	1.3	9.78	0.66	21.86	3.06	8.5	0.4	25.02	5.45	0.12
2020	2020-10-03	N2	last	end_of_juvenil	2.987	0.25	16.47	2.15	55.347	5.229	3.02419	0.30677	3024.19	306.77	0.98	0.07	5.3	0.03	2.66	0.03	2.39	0.12	4	0.05	120.8	11.11	25.01	0.3	27.81	0.37	48.79	0.86	10.27	1.36	55.04	12.7	65.33	6.81	4.3	0.5	9.48	0.57	26.3	7.14	8.27	0.19	29.48	8.01	0.12
2020	2020-10-03	N3	last	end_of_juvenil	3.12	0.12	14.8	0.72	59.207	4.334	3.38353	0.25437	3383.53	254.37	1.19	0.08	5.47	0.09	2.56	0.06	2.35	0.04	3.89	0.1	131.77	11.44	24.32	0.63	33.27	2.28	49.95	0.9	4.33	1.09	51.58	26.4	68.66	20.38	9.1	1.5	9.72	0.33	25.48	4.25	8.63	0.33	58.26	23.07	0.12
2020	2020-10-03	N4	last	end_of_juvenil	2.78	0.1	16.07	0.66	61.22	3.628	3.81687	0.24146	3816.87	241.46	1.34	0.08	5.25	0.04	2.54	0.17	2.39	0.09	3.7	0.08	141.39	9.4	23.15	0.5	30.12	1.22	48.6	0.13	3.83	1.19	20.21	8.9	27.76	5.64	6.1	2.2	9.13	0.42	34.05	4.23	10.8	0.66	52.44	9.61	0.12
2021	2021-05-26	N0	First regrowth	end_of_juvenil	3.2	0.16	6.78	0.29	56.556	0.949	NA	NA	4732.06	594.31	1.593	0.049	5.493	0.184	2.406	0.105	2.075	0.091	3.598	0.117	157.1	15.22	22.488	0.732	35.07	0.495	42.868	1.519	39.3	7.88							7.36	0.76	15.63	3.39	7.45	0.42	15.38	1.4	0.11
2021	2021-05-26	N1	First regrowth	end_of_juvenil	3.3	0.13	7.56	0.4	57.333	1.347	NA	NA	5003.91	684.11	1.527	0.052	5.675	0.176	2.376	0.126	2.198	0.036	3.682	0.127	157.77	15.31	23.015	0.795	33.473	0.58	41.117	0.907	28	9.17							10.42	2.8	24.69	3.96	8.73	1.31	30.76	7.36	0.11
2021	2021-05-26	N2	First regrowth	end_of_juvenil	3.4	0.09	7.78	0.29	59.444	0.949	NA	NA	5119.47	1085.59	1.561	0.065	5.654	0.059	2.58	0.058	2.344	0.021	3.781	0.068	164.01	13.13	23.63	0.424	32.132	0.831	39.716	1.429	13.7	7.31							10.25	0.73	27.05	8.61	9.61	0.74	28.01	12.77	0.11
2021	2021-05-26	N3	First regrowth	end_of_juvenil	3.8	0.37	7.89	0.4	61.444	0.444	NA	NA	5812.35	336.91	1.498	0.093	5.851	0.029	2.812	0.119	2.428	0.091	4.028	0.11	207.11	14.57	25.174	0.685	31.432	0.749	37.389	2.105	16.7	3.84							9.01	0.82	42.75	14.2	6.96	3.15	64.84	18.26	0.11
2021	2021-05-26	N4	First regrowth	end_of_juvenil	4.1	0.22	7.78	0.48	62.889	1.928	NA	NA	6477.85	905.31	1.604	0.018	5.452	0.167	2.675	0.195	2.444	0.1	3.744	0.057	217.1	12.49	23.397	0.359	33.289	2.233	40.933	0.982	19.7	2.33							9.76	1.22	49.16	14.77	7.24	0.38	61.99	12.2	0.11
2021	2021-06-03	N0	First regrowth	floral_initiation	4	0.06	8.47	0.07	79.6	0.529	NA	NA	4993.51	201.38	1.891	0.2	4.75	0.05	2.09	0.06	1.95	0.22	3.02	0.06	150.4	3.25	18.853	0.36	27.75	1.31	45.164	0.96	9.2	0.8							9.24	0.81	20.88	7.53	6.81	1.41	21.82	3.82	0.09
2021	2021-06-03	N1	First regrowth	floral_initiation	3.9	0.19	8.8	0.53	78.6	1.102	NA	NA	5135.25	571.05	1.929	0.13	4.68	0.19	2.16	0.11	2.16	0.06	3.11	0.07	159.02	14.18	19.457	0.47	28.11	1.59	45.973	0.4	8.8	1.64							9.3	0.34	16.76	5.11	9.98	0.28	33.27	5.84	0.09
2021	2021-06-03	N2	First regrowth	floral_initiation	4.1	0.14	9.6	0.2	81.133	2.167	NA	NA	6323.98	118.82	1.835	0.12	4.99	0.06	1.99	0.05	2.36	0.1	2.94	0.03	185.98	2.57	18.385	0.18	24.59	0.75	45.368	0.27	7.7	0.51							12.49	1.95	33.04	22.1	11.07	0.45	40.7	21.31	0.09
2021	2021-06-03	N3	First regrowth	floral_initiation	4.1	0.06	9.47	0.29	82.267	0.769	NA	NA	6807.35	820.51	1.793	0.08	4.63	0.09	2.05	0.07	2.47	0.041	2.93	0.06	199.51	24.36	18.327	0.36	25.84	0.35	44.528	0.7	6.4	0.89							7.58	0.41	65.18	11.06	7.68	0.22	91.3	42.25	0.09
2021	2021-06-03	N4	First regrowth	floral_initiation	4.2	0.09	9.53	0.27	82.733	0.133	NA	NA	7774.24	365.26	1.711	0.02	4.7	0.09	1.82	0.12	2.56	0.103	2.88	0.11	223.74	12.01	18	0.71	26.56	0.5	45.414	0.32	7.7	1.9							8.52	0.44	118.88	33.7	11.09	1.42	109.42	46.69	0.09
2021	2021-06-15	N0	First regrowth	flowering	4.3	0.06	12.4	0.2	101	2.335	NA	NA	8222.16	315.29	1.88	0.11	4.253	0.15	1.45	0.05	2.171	0.02	2.422	0.04	199.2	9.33	15.135	0.26	26.921	0.8	50.3944	2.29176	4.9	2.35	34.94	15.24	67.812	27.08	11.7	4.2	11.38	0.42	19.64	4.86	8.71	0.45	10.12	1.16	0.15
2021	2021-06-15	N1	First regrowth	flowering	4.19	0.07	13.47	0.47	97.667	0.851	NA	NA	8902.2	754.21	1.941	0.12	4.08	0.08	1.52	0.08	2.372	0.081	2.391	0.09	214.09	25.6	14.942	0.54	24.385	3.13	49.6251	1.03002	2.1	0.56	36.85	11.33	73.215	14	25.4	4.9	11.83	0.38	31.04	8.88	10.74	1.59	15.52	6.59	0.15
2021	2021-06-15	N2	First regrowth	flowering	4.3	0.13	13.8	0.4	97.467	1.559	NA	NA	9288.38	894.67	2.007	0.04	4.12	0.06	1.383	0.1	2.326	0.04	2.294	0.09	212.34	18.11	14.336	0.58	24.09	2.32	47.3	3.15275	4.9	0.53	47.51	7.64	98.158	6.71	13.3	0.6	10.84	1.75	34.93	10.2	11.39	0.84	13.48	3.06	0.15
2021	2021-06-15	N3	First regrowth	flowering	4.5	0.19	13.8	0.53	98.267	2.31	NA	NA	8640.26	616.28	2.014	0.02	4.273	0.14	1.307	0.08	2.353	0.04	2.291	0.07	198.6	19.43	14.318	0.42	28.107	1.03	50.6695	0.434747	2.9	1.49	36.65	4.37	71.437	4.49	24.6	13.8	8.49	1.09	34.1	13.3	7.39	1.21	16.55	6.32	0.15
2021	2021-06-15	N4	First regrowth	flowering	4.4	0.1	14.07	0.18	100.333	1.568	NA	NA	10644.9	660.87	2.017	0.1	4.287	0.11	1.283	0.05	2.256	0.1	2.279	0.03	242.72	16.16	14.243	0.16	30.833	1.9	52.8828	1.22452	1.8	0.68	40.53	5.29	99.368	18.32	53	20.7	6.38	1.04	53.36	1.26	7.55	1.09	33.85	2.12	0.15
2021	2021-07-16	N0	Second regrowth	end_of_juvenil	2.9	0.15	6.67	0.29	52.2	1.217	NA	NA	2376.02	108.66	1.382	0.14	5.513	0.19	3.326	0.12	2.013	0.042	3.876	0.06	91.986	2.97	24.228	0.41	34.642	0.83	43.7743	0.930388	19.6	6.7							10.66	0.26	27.08	4.08	10.96	0.85	13.09	1.98	0.18
2021	2021-07-16	N1	Second regrowth	end_of_juvenil	2.82	0.03	7.47	0.18	52.4	0.924	NA	NA	2657.05	173.97	1.223	0.09	6.039	0.36	3.396	0.19	2.589	0.115	4.288	0.17	114.053	9.68	26.803	1.09	32.885	0.73	39.111	1.40362	19.8	6.53							8.26	1.05	32.72	5.23	7.72	0.59	13.78	2.44	0.18
2021	2021-07-16	N2	Second regrowth	end_of_juvenil	3.1	0.14	6.73	0.18	49.8	0.6	NA	NA	2552.2	96.29	1.267	0.05	6.479	0.11	3.46	0.14	2.551	0.186	4.429	0.11	113.254	7.2	27.682	0.69	30.8	0.43	35.5756	2.9405	20.9	0.56							8.96	1.3	32.89	5	8.34	0.41	20.1	9.34	0.18
2021	2021-07-16	N3	Second regrowth	end_of_juvenil	2.7	0.08	7.07	0.33	52.867	2.08	NA	NA	2366.01	87.97	1.275	0.04	6.7	0.39	3.642	0.1	2.666	0.177	4.432	0.2	104.775	5.6	27.699	1.26	31.193	1.62	39.9725	1.08819	10.3	3.56							10.18	1.7	40.34	16.05	6.52	1.02	23.45	14.91	0.18
2021	2021-07-16	N4	Second regrowth	end_of_juvenil	2.9	0.07	7.53	0.13	53.4	0.808	NA	NA	3104.05	336.22	1.32	0.05	6.85	0.35	3.487	0.23	2.718	0.124	4.249	0.15	132.459	17.35	26.557	0.96	34.266	0.85	41.9249	1.51237	16	1.2							5.99	0.69	51.21	23.04	5.03	0.4	46.33	26.94	0.18
2021	2021-07-30	N0	Second regrowth	floral_initiation	3.07	0.06	10.73	0.33	77.467	1.559	NA	NA	4421.5	320.29	1.819	0.07	5.3	0.29	2.267	0.09	2.159	0.124	3.392	0.19	139.23	5.29	21.203	1.21	40.582	0.32	46.295	0.52	17.9	3.13							7.55	1.91	8.38	2.87	6.38	0.45	8.47	2.42	0.14
2021	2021-07-30	N1	Second regrowth	floral_initiation	3.27	0.12	11.33	0.18	77.333	0.933	NA	NA	4829.1	97.65	1.569	0.11	5.329	0.48	2.564	0.08	2.743	0.17	3.791	0.17	183.17	9.7	23.697	1.05	40.639	1.35	45.884	2.32	31.9	7.58							5.99	1	12.78	0.58	6.45	0.66	10.11	1.22	0.14
2021	2021-07-30	N2	Second regrowth	floral_initiation	3.01	0.07	11	0.12	79.267	1.368	NA	NA	4368.16	172.4	1.715	0.02	5.661	0.4	2.288	0.11	2.713	0.262	3.919	0.17	171.57	11.77	24.495	1.03	40.27	1.39	45.767	0.81	38.9	7.12							6.92	0.95	14.34	3.59	4.18	0.44	7.23	2.37	0.14
2021	2021-07-30	N3	Second regrowth	floral_initiation	3.28	0.11	11.87	0.35	76.4	2.6	NA	NA	4163.64	175	1.842	0.07	5.659	0.18	2.427	0.11	3.016	0.09	3.887	0.1	162.11	27.69	24.295	0.65	40.376	1.19	47.908	1.12	15.3	5.33							5.89	0.61	12.56	2.38	5.43	0.45	7.12	0.74	0.14
2021	2021-07-30	N4	Second regrowth	floral_initiation	3.29	0.03	11.6	0.23	79	1.442	NA	NA	5662.34	208.76	2.029	0.09	5.583	0.16	2.386	0.09	3.061	0.255	3.957	0.09	224.41	13.16	24.732	0.57	41.721	0.79	49.075	0.48	18.9	2.51							11.21	1.61	27.88	9.89	8.51	1.51	16.67	8.64	0.14
2021	2021-08-07	N0	Second regrowth	flowering	2.8	0.06	12.89	0.11	77.244	1.253	NA	NA	4685.48	182.76	1.923	0.09	5.1513	0.1	1.957	0.08	2.23	0.147	3.176	0.09	154.31	5.21	19.851	0.56	42.531	0.37	49.953	1.7	9	2.04	31.246	9.46	46.341	14.54	4.1	1.7	8.63	0.2	12.73	3.59	7.04	0.23	7.84	0.19	0.11
2021	2021-08-07	N1	Second regrowth	flowering	2.9	0.06	12.89	0.29	79.556	3.274	NA	NA	5426.88	90.46	1.905	0.03	5.327	0.13	2.063	0.03	2.743	0.372	3.118	0.02	169.16	2.12	19.485	0.12	42.293	0.42	48.364	2.06	14.7	0.56	35.717	6.68	55.893	8.73	2.5	0.2	8.2	0.85	18.69	8.98	7.1	0.75	8.54	1.67	0.11
2021	2021-08-07	N2	Second regrowth	flowering	3.1	0.09	13.44	0.22	79.711	1.812	NA	NA	5455.42	574.79	1.76	0.05	5.547	0.07	2.057	0.05	2.967	0.381	3.338	0.08	181.76	17.67	20.86	0.49	41.32	0.6	48.227	0.57	16.6	1.45	53.818	9.65	95.801	12.85	4.4	1.5	6.51	0.76	19.49	4.41	6.22	0.23	15.66	0.56	0.11
2021	2021-08-07	N3	Second regrowth	flowering	3.1	0.06	12.56	0.29	80.422	3.132	NA	NA	6082.39	475.27	1.744	0.07	5.403	0.08	1.777	0.09	3.069	0.24	3.044	0.1	184.63	12.98	19.023	0.65	41.593	1.06	48.297	0.87	9.8	2.03	32.766	7.01	50.63	2.91	9.4	4.2	6.33	0.28	15.74	2.16	7.29	0.41	17.39	4.07	0.11
2021	2021-08-07	N4	Second regrowth	flowering	3.2	0.05	13	0.38	79.689	1.905	NA	NA	5878.15	504.48	2.095	0.04	5.271	0.06	1.747	0.13	2.775	0.248	3.14	0.14	183.85	14.13	19.627	0.87	41.532	0.61	50.315	0.35	5.3	3.51	25.474	4.1	46.091	5.34	3.1	0.2	6.95	0.57	22.46	4.31	5.51	0.34	12.94	1.23	0.11
2021	2021-09-24	N0	Third regrowth	end_of_juvenil	3.2	0.1	10.56	0.22	60.933	1.235	14.8807	0.719474	3714.51	281.51	0.933	0.055	5.413	0.198	2.27	0.05	2.558	0.177	3.91	0.118	145.318	11.992	24.44	0.738	35.204	0.274	42.114	0.566	14.2	2.11	46.531	2.926	67.115	4.242	3.3	0.4	2.37	0.25	16.97	1.89	2.32	0.34	15.51	2.36	0.18
2021	2021-09-24	N1	Third regrowth	end_of_juvenil	3.17	0.21	11.22	0.48	63.267	0.786	17.3765	0.523641	3626.54	680.19	1.081	0.066	5.51	0.021	2.303	0.055	2.892	0.171	3.846	0.082	139.003	25.546	24.038	0.514	36.506	2.266	38.755	0.684	20.4	6.3	64.166	5.275	89.518	17.931	4.4	2.5	2.07	0.6	16.45	1.53	1.69	0.55	14.97	1.08	0.18
2021	2021-09-24	N2	Third regrowth	end_of_juvenil	3.2	0.1	11.13	0.41	60.333	0.581	18.051	1.54728	3944.43	333.29	1.057	0.083	5.47	0.301	2	0.238	2.713	0.26	3.706	0.07	146.483	14.55	23.162	0.435	40.486	1.919	38.919	1.522	17.6	8.8	68.644	6.867	101.081	16.011	7.1	4.2	1.4	0.86	15.09	1.64	1.65	0.2	12.81	1.81	0.18
2021	2021-09-24	N3	Third regrowth	end_of_juvenil	3.1	0.07	10.89	0.22	63.533	2.724	17.3503	0.971757	4048.73	359.37	1.05	0.07	5.537	0.038	2.16	0.045	3.051	0.221	3.694	0.028	149.706	14.255	23.086	0.174	37.963	2.084	41.894	3.166	14.6	9.32	64.594	6.362	97.843	17.761	10.1	4.5	1.53	0.18	16.84	0.3	2.02	0.32	14.43	0.31	0.18
2021	2021-09-24	N4	Third regrowth	end_of_juvenil	3.1	0.14	10.78	0.22	61.733	1.392	19.24	0.540546	4020.83	288.6	1.037	0.096	5.597	0.08	2.263	0.055	3.115	0.101	3.902	0.076	156.775	11.132	24.384	0.475	37.071	2.605	41.543	1.995	12	6.48	57.912	6.81	92.293	16.584	8.2	2.8	2.76	0.64	15.94	0.53	2.4	0.7	13.48	0.51	0.18
[truncated: 2 more columns]

## Sheet: two yield
year	Date	treatment-	treatment	treatments	yield	yield_error
2020	3/10/2020	N0	N0	N0	2.88795	0.35464
2020	3/10/2020	N20	N20	N1	2.90784	0.05942
2020	3/10/2020	N60	N60	N2	3.02419	0.30677
2020	3/10/2020	N120	N120	N3	3.38353	0.25437
2020	3/10/2020	N180	N180	N4	3.81687	0.24146
2021	24/09/2021	N0	N0	N0	14.8807	0.719474
2021	24/09/2021	N20	N20	N1	17.3765	0.523641
2021	24/09/2021	N60	N60	N2	18.051	1.54728
2021	24/09/2021	N120	N120	N3	17.3503	0.971757
2021	24/09/2021	N180	N180	N4	19.24	0.540546

## Sheet: soil N 
year	Date	treatment	1treatment	cut1	cut	StageName	layer	a-nh4_1	a-nh4_1_Error	a-no3_1	a-no3_1_Error	nh4_1	nh4_1_Error	no3_1	no3_1_Error
2021	2021-05-26	N0	N0	First regrowth	First cut	end_of_juvenil	0 - 20 cm	7.36	0.76	15.63	3.39	2.83077	0.292308	6.01154	1.30385
2021	2021-05-26	N20	N1	First regrowth	First cut	end_of_juvenil	0 - 20 cm	10.42	2.8	24.69	3.96	4.00769	1.07692	9.49615	1.52308
2021	2021-05-26	N60	N2	First regrowth	First cut	end_of_juvenil	0 - 20 cm	10.25	0.73	27.05	8.61	3.94231	0.280769	10.4038	3.31154
2021	2021-05-26	N120	N3	First regrowth	First cut	end_of_juvenil	0 - 20 cm	9.01	0.82	42.75	14.2	3.46538	0.315385	16.4423	5.46154
2021	2021-05-26	N180	N4	First regrowth	First cut	end_of_juvenil	0 - 20 cm	9.76	1.22	49.16	14.77	3.75385	0.469231	18.9077	5.68077
2021	2021-06-03	N0	N0	First regrowth	First cut	floral_initiation	0 - 20 cm	9.24	0.81	20.88	7.53	3.55385	0.311538	8.03077	2.89615
2021	2021-06-03	N20	N1	First regrowth	First cut	floral_initiation	0 - 20 cm	9.3	0.34	16.76	5.11	3.57692	0.130769	6.44615	1.96538
2021	2021-06-03	N60	N2	First regrowth	First cut	floral_initiation	0 - 20 cm	12.49	1.95	33.04	22.1	4.80385	0.75	12.7077	8.5
2021	2021-06-03	N120	N3	First regrowth	First cut	floral_initiation	0 - 20 cm	7.58	0.41	65.18	11.06	2.91538	0.157692	25.0692	4.25385
2021	2021-06-03	N180	N4	First regrowth	First cut	floral_initiation	0 - 20 cm	8.52	0.44	118.88	33.7	3.27692	0.169231	45.7231	12.9615
2021	2021-06-15	N0	N0	First regrowth	First cut	flowering	0 - 20 cm	11.38	0.42	19.64	4.86	4.37692	0.161538	7.55385	1.86923
2021	2021-06-15	N20	N1	First regrowth	First cut	flowering	0 - 20 cm	11.83	0.38	31.04	8.88	4.55	0.146154	11.9385	3.41538
2021	2021-06-15	N60	N2	First regrowth	First cut	flowering	0 - 20 cm	10.84	1.75	34.93	10.2	4.16923	0.673077	13.4346	3.92308
2021	2021-06-15	N120	N3	First regrowth	First cut	flowering	0 - 20 cm	8.49	1.09	34.1	13.3	3.26538	0.419231	13.1154	5.11538
2021	2021-06-15	N180	N4	First regrowth	First cut	flowering	0 - 20 cm	6.38	1.04	53.36	1.26	2.45385	0.4	20.5231	0.484615
2021	2021-07-16	N0	N0	Second regrowth	Second cut	end_of_juvenil	0 - 20 cm	10.66	0.26	27.08	4.08	4.1	0.1	10.4154	1.56923
2021	2021-07-16	N20	N1	Second regrowth	Second cut	end_of_juvenil	0 - 20 cm	8.26	1.05	32.72	5.23	3.17692	0.403846	12.5846	2.01154
2021	2021-07-16	N60	N2	Second regrowth	Second cut	end_of_juvenil	0 - 20 cm	8.96	1.3	32.89	5	3.44615	0.5	12.65	1.92308
2021	2021-07-16	N120	N3	Second regrowth	Second cut	end_of_juvenil	0 - 20 cm	10.18	1.7	40.34	16.05	3.91538	0.653846	15.5154	6.17308
2021	2021-07-16	N180	N4	Second regrowth	Second cut	end_of_juvenil	0 - 20 cm	5.99	0.69	51.21	23.04	2.30385	0.265385	19.6962	8.86154
2021	2021-07-30	N0	N0	Second regrowth	Second cut	floral_initiation	0 - 20 cm	7.55	1.91	8.38	2.87	2.90385	0.734615	3.22308	1.10385
2021	2021-07-30	N20	N1	Second regrowth	Second cut	floral_initiation	0 - 20 cm	5.99	1	12.78	0.58	2.30385	0.384615	4.91538	0.223077
2021	2021-07-30	N60	N2	Second regrowth	Second cut	floral_initiation	0 - 20 cm	6.92	0.95	14.34	3.59	2.66154	0.365385	5.51538	1.38077
2021	2021-07-30	N120	N3	Second regrowth	Second cut	floral_initiation	0 - 20 cm	5.89	0.61	12.56	2.38	2.26538	0.234615	4.83077	0.915385
2021	2021-07-30	N180	N4	Second regrowth	Second cut	floral_initiation	0 - 20 cm	11.21	1.61	27.88	9.89	4.31154	0.619231	10.7231	3.80385
2021	2021-08-07	N0	N0	Second regrowth	Second cut	flowering	0 - 20 cm	8.63	0.2	12.73	3.59	3.31923	0.0769231	4.89615	1.38077
2021	2021-08-07	N20	N1	Second regrowth	Second cut	flowering	0 - 20 cm	8.2	0.85	18.69	8.98	3.15385	0.326923	7.18846	3.45385
2021	2021-08-07	N60	N2	Second regrowth	Second cut	flowering	0 - 20 cm	6.51	0.76	19.49	4.41	2.50385	0.292308	7.49615	1.69615
2021	2021-08-07	N120	N3	Second regrowth	Second cut	flowering	0 - 20 cm	6.33	0.28	15.74	2.16	2.43462	0.107692	6.05385	0.830769
2021	2021-08-07	N180	N4	Second regrowth	Second cut	flowering	0 - 20 cm	6.95	0.57	22.46	4.31	2.67308	0.219231	8.63846	1.65769
2021	2021-09-24	N0	N0	Third regrowth	Third cut	end_of_juvenil	0 - 20 cm	2.37	0.25	16.97	1.89	0.911538	0.0961538	6.52692	0.726923
2021	2021-09-24	N20	N1	Third regrowth	Third cut	end_of_juvenil	0 - 20 cm	2.07	0.6	16.45	1.53	0.796154	0.230769	6.32692	0.588462
2021	2021-09-24	N60	N2	Third regrowth	Third cut	end_of_juvenil	0 - 20 cm	1.4	0.86	15.09	1.64	0.538462	0.330769	5.80385	0.630769
2021	2021-09-24	N120	N3	Third regrowth	Third cut	end_of_juvenil	0 - 20 cm	1.53	0.18	16.84	0.3	0.588462	0.0692308	6.47692	0.115385
2021	2021-09-24	N180	N4	Third regrowth	Third cut	end_of_juvenil	0 - 20 cm	2.76	0.64	15.94	0.53	1.06154	0.246154	6.13077	0.203846
2021	2021-05-26	N0	N0	First regrowth	First cut	end_of_juvenil	20 - 40 cm	7.45	0.42	15.38	1.4	2.86538	0.161538	5.91538	0.538462
2021	2021-05-26	N20	N1	First regrowth	First cut	end_of_juvenil	20 - 40 cm	8.73	1.31	30.76	7.36	3.35769	0.503846	11.8308	2.83077
2021	2021-05-26	N60	N2	First regrowth	First cut	end_of_juvenil	20 - 40 cm	9.61	0.74	28.01	12.77	3.69615	0.284615	10.7731	4.91154
2021	2021-05-26	N120	N3	First regrowth	First cut	end_of_juvenil	20 - 40 cm	6.96	3.15	64.84	18.26	2.67692	1.21154	24.9385	7.02308
2021	2021-05-26	N180	N4	First regrowth	First cut	end_of_juvenil	20 - 40 cm	7.24	0.38	61.99	12.2	2.78462	0.146154	23.8423	4.69231
2021	2021-06-03	N0	N0	First regrowth	First cut	floral_initiation	20 - 40 cm	6.81	1.41	21.82	3.82	2.61923	0.542308	8.39231	1.46923
2021	2021-06-03	N20	N1	First regrowth	First cut	floral_initiation	20 - 40 cm	9.98	0.28	33.27	5.84	3.83846	0.107692	12.7962	2.24615
2021	2021-06-03	N60	N2	First regrowth	First cut	floral_initiation	20 - 40 cm	11.07	0.45	40.7	21.31	4.25769	0.173077	15.6538	8.19615
2021	2021-06-03	N120	N3	First regrowth	First cut	floral_initiation	20 - 40 cm	7.68	0.22	91.3	42.25	2.95385	0.0846154	35.1154	16.25
2021	2021-06-03	N180	N4	First regrowth	First cut	floral_initiation	20 - 40 cm	11.09	1.42	109.42	46.69	4.26538	0.546154	42.0846	17.9577
2021	2021-06-15	N0	N0	First regrowth	First cut	flowering	20 - 40 cm	8.71	0.45	10.12	1.16	3.35	0.173077	3.89231	0.446154
2021	2021-06-15	N20	N1	First regrowth	First cut	flowering	20 - 40 cm	10.74	1.59	15.52	6.59	4.13077	0.611538	5.96923	2.53462
2021	2021-06-15	N60	N2	First regrowth	First cut	flowering	20 - 40 cm	11.39	0.84	13.48	3.06	4.38077	0.323077	5.18462	1.17692
2021	2021-06-15	N120	N3	First regrowth	First cut	flowering	20 - 40 cm	7.39	1.21	16.55	6.32	2.84231	0.465385	6.36538	2.43077
2021	2021-06-15	N180	N4	First regrowth	First cut	flowering	20 - 40 cm	7.55	1.09	33.85	2.12	2.90385	0.419231	13.0192	0.815385
2021	2021-07-16	N0	N0	Second regrowth	Second cut	end_of_juvenil	20 - 40 cm	10.96	0.85	13.09	1.98	4.21538	0.326923	5.03462	0.761538
2021	2021-07-16	N20	N1	Second regrowth	Second cut	end_of_juvenil	20 - 40 cm	7.72	0.59	13.78	2.44	2.96923	0.226923	5.3	0.938462
2021	2021-07-16	N60	N2	Second regrowth	Second cut	end_of_juvenil	20 - 40 cm	8.34	0.41	20.1	9.34	3.20769	0.157692	7.73077	3.59231
2021	2021-07-16	N120	N3	Second regrowth	Second cut	end_of_juvenil	20 - 40 cm	6.52	1.02	23.45	14.91	2.50769	0.392308	9.01923	5.73462
2021	2021-07-16	N180	N4	Second regrowth	Second cut	end_of_juvenil	20 - 40 cm	5.03	0.4	46.33	26.94	1.93462	0.153846	17.8192	10.3615
2021	2021-07-30	N0	N0	Second regrowth	Second cut	floral_initiation	20 - 40 cm	6.38	0.45	8.47	2.42	2.45385	0.173077	3.25769	0.930769
2021	2021-07-30	N20	N1	Second regrowth	Second cut	floral_initiation	20 - 40 cm	6.45	0.66	10.11	1.22	2.48077	0.253846	3.88846	0.469231
2021	2021-07-30	N60	N2	Second regrowth	Second cut	floral_initiation	20 - 40 cm	4.18	0.44	7.23	2.37	1.60769	0.169231	2.78077	0.911538
2021	2021-07-30	N120	N3	Second regrowth	Second cut	floral_initiation	20 - 40 cm	5.43	0.45	7.12	0.74	2.08846	0.173077	2.73846	0.284615
2021	2021-07-30	N180	N4	Second regrowth	Second cut	floral_initiation	20 - 40 cm	8.51	1.51	16.67	8.64	3.27308	0.580769	6.41154	3.32308
2021	2021-08-07	N0	N0	Second regrowth	Second cut	flowering	20 - 40 cm	7.04	0.23	7.84	0.19	2.70769	0.0884615	3.01538	0.0730769
2021	2021-08-07	N20	N1	Second regrowth	Second cut	flowering	20 - 40 cm	7.1	0.75	8.54	1.67	2.73077	0.288462	3.28462	0.642308
2021	2021-08-07	N60	N2	Second regrowth	Second cut	flowering	20 - 40 cm	6.22	0.23	15.66	0.56	2.39231	0.0884615	6.02308	0.215385
2021	2021-08-07	N120	N3	Second regrowth	Second cut	flowering	20 - 40 cm	7.29	0.41	17.39	4.07	2.80385	0.157692	6.68846	1.56538
2021	2021-08-07	N180	N4	Second regrowth	Second cut	flowering	20 - 40 cm	5.51	0.34	12.94	1.23	2.11923	0.130769	4.97692	0.473077
2021	2021-09-24	N0	N0	Third regrowth	Third cut	end_of_juvenil	20 - 40 cm	2.32	0.34	15.51	2.36	0.892308	0.130769	5.96538	0.907692
2021	2021-09-24	N20	N1	Third regrowth	Third cut	end_of_juvenil	20 - 40 cm	1.69	0.55	14.97	1.08	0.65	0.211538	5.75769	0.415385
2021	2021-09-24	N60	N2	Third regrowth	Third cut	end_of_juvenil	20 - 40 cm	1.65	0.2	12.81	1.81	0.634615	0.0769231	4.92692	0.696154
2021	2021-09-24	N120	N3	Third regrowth	Third cut	end_of_juvenil	20 - 40 cm	2.02	0.32	14.43	0.31	0.776923	0.123077	5.55	0.119231
2021	2021-09-24	N180	N4	Third regrowth	Third cut	end_of_juvenil	20 - 40 cm	2.4	0.7	13.48	0.51	0.923077	0.269231	5.18462	0.196154
2020	2020-08-06	N0	N0	NA	NA	end_of_juvenil	0 - 20 cm	7.59	0.57	27.11	6.53	2.91923	0.219231	10.4269	2.51154
2020	2020-08-06	N20	N1	NA	NA	end_of_juvenil	0 - 20 cm	7.32	0.07	41.96	10.78	2.81538	0.0269231	16.1385	4.14615
2020	2020-08-06	N60	N2	NA	NA	end_of_juvenil	0 - 20 cm	8.24	0.45	38.33	2.36	3.16923	0.173077	14.7423	0.907692
2020	2020-08-06	N120	N3	NA	NA	end_of_juvenil	0 - 20 cm	8.09	1.09	59.61	8.51	3.11154	0.419231	22.9269	3.27308
2020	2020-08-06	N180	N4	NA	NA	end_of_juvenil	0 - 20 cm	6.75	0.62	53.91	11.93	2.59615	0.238462	20.7346	4.58846
2020	2020-08-27	N0	N0	NA	NA	end_of_juvenil	0 - 20 cm	8.05	0.24	21.26	7.93	3.09615	0.0923077	8.17692	3.05
2020	2020-08-27	N20	N1	NA	NA	end_of_juvenil	0 - 20 cm	9.43	0.3	28.9	9.34	3.62692	0.115385	11.1154	3.59231
2020	2020-08-27	N60	N2	NA	NA	end_of_juvenil	0 - 20 cm	7.23	0.26	21.03	2.95	2.78077	0.1	8.08846	1.13462
2020	2020-08-27	N120	N3	NA	NA	end_of_juvenil	0 - 20 cm	8.56	0.38	32.28	2.4	3.29231	0.146154	12.4154	0.923077
2020	2020-08-27	N180	N4	NA	NA	end_of_juvenil	0 - 20 cm	9.99	0.64	67.01	15.89	3.84231	0.246154	25.7731	6.11154
2020	2020-10-03	N0	N0	NA	NA	end_of_juvenil	0 - 20 cm	8.47	0.3	18.73	1.29	3.25769	0.115385	7.20385	0.496154
2020	2020-10-03	N20	N1	NA	NA	end_of_juvenil	0 - 20 cm	9.78	0.66	21.86	3.06	3.76154	0.253846	8.40769	1.17692
2020	2020-10-03	N60	N2	NA	NA	end_of_juvenil	0 - 20 cm	9.48	0.57	26.3	7.14	3.64615	0.219231	10.1154	2.74615
2020	2020-10-03	N120	N3	NA	NA	end_of_juvenil	0 - 20 cm	9.72	0.33	25.48	4.25	3.73846	0.126923	9.8	1.63462
2020	2020-10-03	N180	N4	NA	NA	end_of_juvenil	0 - 20 cm	9.13	0.42	34.05	4.23	3.51154	0.161538	13.0962	1.62692
2020	2020-08-06	N0	N0	NA	NA	end_of_juvenil	20 - 40 cm	6.56	0.39	28.39	10.87	2.52308	0.15	10.9192	4.18077
2020	2020-08-06	N20	N1	NA	NA	end_of_juvenil	20 - 40 cm	7.87	0.06	31.21	11.68	3.02692	0.0230769	12.0038	4.49231
2020	2020-08-06	N60	N2	NA	NA	end_of_juvenil	20 - 40 cm	8.4	0.32	33.78	4.71	3.23077	0.123077	12.9923	1.81154
2020	2020-08-06	N120	N3	NA	NA	end_of_juvenil	20 - 40 cm	9.06	1.29	68.51	4.39	3.48462	0.496154	26.35	1.68846
2020	2020-08-06	N180	N4	NA	NA	end_of_juvenil	20 - 40 cm	7.61	0.3	77.4	11.04	2.92692	0.115385	29.7692	4.24615
2020	2020-08-27	N0	N0	NA	NA	end_of_juvenil	20 - 40 cm	6.53	0.38	37.62	12.41	2.51154	0.146154	14.4692	4.77308
2020	2020-08-27	N20	N1	NA	NA	end_of_juvenil	20 - 40 cm	7.84	0.91	31.93	4.1	3.01538	0.35	12.2808	1.57692
2020	2020-08-27	N60	N2	NA	NA	end_of_juvenil	20 - 40 cm	7.56	0.17	51.46	21.34	2.90769	0.0653846	19.7923	8.20769
2020	2020-08-27	N120	N3	NA	NA	end_of_juvenil	20 - 40 cm	8.64	0.79	71.64	21.4	3.32308	0.303846	27.5538	8.23077
2020	2020-08-27	N180	N4	NA	NA	end_of_juvenil	20 - 40 cm	7.76	0.68	114.21	35.56	2.98462	0.261538	43.9269	13.6769
2020	2020-10-03	N0	N0	NA	NA	end_of_juvenil	20 - 40 cm	8.1	0.6	23.46	4.67	3.11538	0.230769	9.02308	1.79615
2020	2020-10-03	N20	N1	NA	NA	end_of_juvenil	20 - 40 cm	8.5	0.4	25.02	5.45	3.26923	0.153846	9.62308	2.09615
2020	2020-10-03	N60	N2	NA	NA	end_of_juvenil	20 - 40 cm	8.27	0.19	29.48	8.01	3.18077	0.0730769	11.3385	3.08077
2020	2020-10-03	N120	N3	NA	NA	end_of_juvenil	20 - 40 cm	8.63	0.33	58.26	23.07	3.31923	0.126923	22.4077	8.87308
2020	2020-10-03	N180	N4	NA	NA	end_of_juvenil	20 - 40 cm	10.8	0.66	52.44	9.61	4.15385	0.253846	20.1692	3.69615

## Sheet: met
date	temp	rain
2020-01-01	-13.4	0
2020-01-02	-11.7	0
2020-01-03	-11.4	0
2020-01-04	-10.6	0
2020-01-05	-4.8	2.2
2020-01-06	-5	1.5
2020-01-07	-10.8	0
2020-01-08	-15.4	0
2020-01-09	-14.6	0
2020-01-10	-14.6	0
2020-01-11	-14.5	0
2020-01-12	-15.2	0.3
2020-01-13	-19.7	0
2020-01-14	-17.2	0
2020-01-15	-15.9	0
2020-01-16	-14.1	0
2020-01-17	-12.1	0
2020-01-18	-14	0
2020-01-19	-14.1	0
2020-01-20	-13.7	0
2020-01-21	-8.8	0
2020-01-22	-11.2	0
2020-01-23	-12.1	0
2020-01-24	-13.5	0
2020-01-25	-12.3	0
2020-01-26	-9	0
2020-01-27	-7.3	0
2020-01-28	-9.5	0
2020-01-29	-9.2	-0.1
2020-01-30	-10.8	0
2020-01-31	-15.7	0
2020-02-01	-13.9	0
2020-02-02	-11.7	0
2020-02-03	-13.4	0
2020-02-04	-10.7	0
2020-02-05	-8.5	0
2020-02-06	-9.1	0
2020-02-07	-7.7	0
2020-02-08	-8.2	0
2020-02-09	-7.6	0
2020-02-10	-3.8	0
2020-02-11	-0.2	0
2020-02-12	0.5	0
2020-02-13	1.7	0
2020-02-14	-8.6	0
2020-02-15	-10.1	0
2020-02-16	-8.5	0
2020-02-17	-7.1	0
2020-02-18	-3.1	0
2020-02-19	-1.7	0
2020-02-20	-1.5	0
2020-02-21	-3.7	0
2020-02-22	-4.7	0
2020-02-23	0.1	0
2020-02-24	4.2	0
2020-02-25	2.5	0
2020-02-26	3.3	0
2020-02-27	5.1	0
2020-02-28	4	0
2020-02-29	3	0
2020-03-01	-0.7	0
2020-03-02	-1.9	0
2020-03-03	-4.1	0
2020-03-04	-4.7	0
2020-03-05	-0.4	0
2020-03-06	1.1	0.2
2020-03-07	0.7	0
2020-03-08	3.6	0
2020-03-09	0.6	0
2020-03-10	-0.3	0
2020-03-11	2.6	0
2020-03-12	3.4	0
2020-03-13	0	0
2020-03-14	3	0
2020-03-15	5.3	0
2020-03-16	7.7	0
2020-03-17	9.6	0
2020-03-18	4.3	0
2020-03-19	4.9	0
2020-03-20	10.6	0
2020-03-21	8.2	0
2020-03-22	7.1	0
2020-03-23	10.8	0
2020-03-24	9.6	0
2020-03-25	8.9	0.2
2020-03-26	1.4	0.4
2020-03-27	-0.3	0
2020-03-28	2.2	0
2020-03-29	5.6	3
2020-03-30	7.4	0
2020-03-31	7.2	0
2020-04-01	4.6	0
2020-04-02	5.7	0
2020-04-03	8.6	0
2020-04-04	10.4	0
2020-04-05	10.1	0
2020-04-06	11.4	0
2020-04-07	13.4	0
2020-04-08	12.5	0
2020-04-09	8.8	0
2020-04-10	6.7	0
2020-04-11	8.7	0
2020-04-12	11.3	0
2020-04-13	11.2	0
2020-04-14	14.4	0
2020-04-15	13	0
2020-04-16	9.6	0
2020-04-17	12	0
2020-04-18	10.4	0
2020-04-19	7.8	1.2
2020-04-20	5	0
2020-04-21	2.9	0
2020-04-22	2.6	0
2020-04-23	5.4	0
2020-04-24	12.2	0
2020-04-25	14	0
2020-04-26	12.5	0
2020-04-27	13.6	0
2020-04-28	16	0
2020-04-29	20.5	0
2020-04-30	22.5	0
2020-05-01	23.7	0
2020-05-02	24.9	0
2020-05-03	20.1	0
2020-05-04	18.2	0
2020-05-05	18.3	0
2020-05-06	17.1	3.9
2020-05-07	16.8	2
2020-05-08	17	0
2020-05-09	16.1	0
2020-05-10	11.9	0
2020-05-11	15.2	0
2020-05-12	20.5	0
2020-05-13	19.6	0
2020-05-14	19.4	0
2020-05-15	21.5	0
2020-05-16	15.4	0
2020-05-17	11.8	0
2020-05-18	16.8	0
2020-05-19	19.2	0
2020-05-20	20.6	0
2020-05-21	21	0
2020-05-22	17.6	0
2020-05-23	14.3	0
2020-05-24	15.8	0.3
2020-05-25	13.2	3.1
2020-05-26	14.4	1
2020-05-27	15.9	0
2020-05-28	21.6	0
2020-05-29	22.1	0
2020-05-30	18.3	0
2020-05-31	16	3.1
2020-06-01	18.4	0
2020-06-02	22.8	0
2020-06-03	24.6	0
2020-06-04	24.3	0
2020-06-05	26.4	0
2020-06-06	27.2	0
2020-06-07	26.7	0
2020-06-08	18.7	0.9
2020-06-09	19.7	0
2020-06-10	23.5	0
2020-06-11	19	2.9
2020-06-12	20.3	0
2020-06-13	21.7	0
2020-06-14	21.4	0
2020-06-15	24.2	1.3
2020-06-16	25.8	0
2020-06-17	21.1	2
2020-06-18	24.1	1
2020-06-19	24.7	0
2020-06-20	25.8	0
2020-06-21	25.2	0.7
2020-06-22	20.8	6.9
2020-06-23	22.9	0
2020-06-24	23.1	0
2020-06-25	21.9	0
2020-06-26	24.4	0
2020-06-27	25.7	0
2020-06-28	20	7.2
2020-06-29	19.1	2
2020-06-30	23.3	6.1
2020-07-01	21.9	0.1
2020-07-02	20.3	0
2020-07-03	21.1	1.8
2020-07-04	19.8	7.3
2020-07-05	20.7	0
2020-07-06	23.6	0
2020-07-07	26.2	0
2020-07-08	24.2	3.8
2020-07-09	21.8	12.7
2020-07-10	23.3	3.5
2020-07-11	20.9	8.3
2020-07-12	19.5	4.9
2020-07-13	22.5	0
2020-07-14	24.5	0
2020-07-15	24	0
2020-07-16	22.6	999990
2020-07-17	19.6	7.7
2020-07-18	20.6	0.5
2020-07-19	20.7	0
2020-07-20	23.6	0
2020-07-21	25.4	0
2020-07-22	24.2	0
2020-07-23	24.3	0
2020-07-24	25	0
2020-07-25	21.4	6.1
2020-07-26	19.9	9.1
2020-07-27	21.7	0
2020-07-28	21.8	4.2
2020-07-29	24.7	0
2020-07-30	23.5	3.5
2020-07-31	22.9	3.4
2020-08-01	21	4.6
2020-08-02	22.8	0
2020-08-03	23.3	0
2020-08-04	23.8	0
2020-08-05	25.7	0
2020-08-06	23.2	0
2020-08-07	24	1.7
2020-08-08	21.6	13.1
2020-08-09	21	0
2020-08-10	21.6	0.2
2020-08-11	22.8	0
2020-08-12	20.6	9.3
2020-08-13	20.8	0
2020-08-14	23.3	0
2020-08-15	20.7	0.7
2020-08-16	22.2	0
2020-08-17	18.3	24.2
2020-08-18	17.5	3.5
2020-08-19	19.6	2
2020-08-20	20.3	0
2020-08-21	20.5	0
2020-08-22	19.1	3.4
2020-08-23	18.1	16.7
2020-08-24	18.4	0
2020-08-25	21.7	0
2020-08-26	21.1	0
2020-08-27	21.6	0
2020-08-28	19.9	17.4
2020-08-29	20.4	2.3
2020-08-30	16.9	13.6
2020-08-31	16	2.3
2020-09-01	16.9	0.8
2020-09-02	14.2	0.7
2020-09-03	15.4	0
2020-09-04	16.9	0
2020-09-05	18.1	0
2020-09-06	19.9	11.4
2020-09-07	19.5	0
2020-09-08	19.4	0
2020-09-09	17.8	0
2020-09-10	18.2	0
2020-09-11	17.2	0
2020-09-12	18.6	0
2020-09-13	15.9	38.6
2020-09-14	14.5	0.1
2020-09-15	15.6	0.3
2020-09-16	12.5	0
2020-09-17	13	0
2020-09-18	14	0
2020-09-19	16	2.2
2020-09-20	16.7	0
2020-09-21	15.6	2.4
2020-09-22	14.2	0.1
2020-09-23	12.4	6.2
2020-09-24	13.3	0
2020-09-25	14.9	0
2020-09-26	15.9	0
2020-09-27	15.9	2.9
2020-09-28	15.1	0.2
2020-09-29	13.7	0
2020-09-30	12.6	0
2020-10-01	10.9	0.2
2020-10-02	9.2	0
2020-10-03	7.1	0
2020-10-04	3.4	0
2020-10-05	4.8	0
2020-10-06	6.9	0
2020-10-07	11	0
2020-10-08	11.2	0
2020-10-09	11.5	0
2020-10-10	12.1	0.1
2020-10-11	7.3	14.8
2020-10-12	5.6	0
2020-10-13	6.4	0
2020-10-14	6.9	0
2020-10-15	7.3	0
2020-10-16	6	0
2020-10-17	5.3	0
2020-10-18	5.9	0
2020-10-19	6.9	0
2020-10-20	8.5	0
2020-10-21	3.2	0
2020-10-22	3.7	0
2020-10-23	2.6	0
2020-10-24	6.7	0
2020-10-25	11.7	0
2020-10-26	10.1	0
2020-10-27	1.6	0
2020-10-28	3.1	0
2020-10-29	4.9	0
2020-10-30	5.2	0
2020-10-31	6.4	0
2020-11-01	4	0
2020-11-02	2.8	0
2020-11-03	-0.2	0
2020-11-04	2.6	0
2020-11-05	4.8	0
2020-11-06	4.4	0
2020-11-07	4.2	0
2020-11-08	0.5	0
2020-11-09	1.6	0
2020-11-10	3.8	0
2020-11-11	5.4	0
2020-11-12	4.2	0
2020-11-13	4	0
2020-11-14	9.3	0
2020-11-15	8.5	0
2020-11-16	8.3	0
2020-11-17	8	0.3
2020-11-18	3.6	2.9
2020-11-19	-1.8	0
2020-11-20	-3	0
2020-11-21	-3.8	0
2020-11-22	-8.9	0
2020-11-23	-9.5	0
2020-11-24	-8.3	0
2020-11-25	-6	0
2020-11-26	-6.6	0
2020-11-27	-7.7	0
2020-11-28	-7.5	0
2020-11-29	-8.1	0
2020-11-30	-10	0
2020-12-01	-7.9	0
2020-12-02	-8.1	0
2020-12-03	-12	0
2020-12-04	-11.9	0
2020-12-05	-10.8	0
2020-12-06	-8.3	0.1
2020-12-07	-13.2	0
2020-12-08	-11.6	0
2020-12-09	-8.2	0
2020-12-10	-9.4	0
2020-12-11	-9	0
2020-12-12	-8.5	0
2020-12-13	-13.3	0
2020-12-14	-16.1	0
2020-12-15	-14.1	0
2020-12-16	-14.4	0
2020-12-17	-13.2	0
2020-12-18	-12.3	0
2020-12-19	-12.9	0
2020-12-20	-12.4	0
2020-12-21	-10.9	0
2020-12-22	-10	0
2020-12-23	-9.9	0
2020-12-24	-10.4	0
2020-12-25	-10.3	0
2020-12-26	-9.3	0
2020-12-27	-7.4	0
2020-12-28	-9.6	0
2020-12-29	-19	0
2020-12-30	-18.4	0
2020-12-31	-18.5	0
2021-01-01	-14.5	0
2021-01-02	-11	0
2021-01-03	-12.5	0
2021-01-04	-11.9	0
2021-01-05	-17.15	0
2021-01-06	-22.4	0
2021-01-07	-18	0
2021-01-08	-13.6	0
2021-01-09	-12.5	0
2021-01-10	-12.5	0
2021-01-11	-11.5	0
2021-01-12	-7.9	0
2021-01-13	-7.9	0
2021-01-14	-4.3	0
2021-01-15	-8.2	0
2021-01-16	-12.8	0
2021-01-17	-12.6	0
2021-01-18	-9.5	0
2021-01-19	-3.7	0
2021-01-20	-6.8	0
2021-01-21	-7.2	0
2021-01-22	-5.7	0
2021-01-23	-2.8	0
2021-01-24	-1.9	0
2021-01-25	-2.3	0
2021-01-26	-7.9	0
2021-01-27	-8.5	0
2021-01-28	-10	0
2021-01-29	-7.2	0
2021-01-30	-6.2	0
2021-01-31	-4.9	0
2021-02-01	-8.6	0
2021-02-02	-13.8	0
2021-02-03	-5.5	0
2021-02-04	-7.1	0
2021-02-05	-2.6	0
2021-02-06	-2.3	0
2021-02-07	-5	0
2021-02-08	-5.3	0
2021-02-09	-3.1	0
2021-02-10	-1	0
2021-02-11	1.3	0
2021-02-12	-1.8	0
2021-02-13	0.8	0
2021-02-14	-2.3	0
2021-02-15	-6.4	0
2021-02-16	-4.3	0
2021-02-17	-4.2	0
2021-02-18	-2.1	0
2021-02-19	1.3	0
2021-02-20	4	0
2021-02-21	8.3	0
2021-02-22	1.3	0
2021-02-23	3.6	0
2021-02-24	2.8	0
2021-02-25	4.7	0
2021-02-26	3.8	0
2021-02-27	2.9	0
2021-02-28	0.6	4.8
2021-03-01	0.2	0
2021-03-02	-0.4	0
2021-03-03	2.7	0
2021-03-04	3.4	0
2021-03-05	3	0
2021-03-06	-0.2	0
2021-03-07	1.6	0
2021-03-08	5.4	0
2021-03-09	5.8	0
2021-03-10	8	0
2021-03-11	7.3	0
2021-03-12	7.9	8.1
2021-03-13	7.7	0
2021-03-14	9.6	0
2021-03-15	2	0
2021-03-16	1	0
2021-03-17	4.7	0.5
2021-03-18	4.3	4.3
2021-03-19	4.7	0.5
2021-03-20	1	0
2021-03-21	0.6	0
2021-03-22	3.4	0
2021-03-23	5.4	0
2021-03-24	9.1	0
2021-03-25	10.6	0
2021-03-26	9.4	4.5
2021-03-27	10.8	0
2021-03-28	6	0
2021-03-29	6.7	0
2021-03-30	9.6	0
2021-03-31	12.8	0
2021-04-01	7.6	15.9
2021-04-02	7.6	0
2021-04-03	6	0
2021-04-04	6.2	0
2021-04-05	5.9	5.7
2021-04-06	7.5	1.2
2021-04-07	8.9	0
2021-04-08	11.2	0
2021-04-09	11.7	0
2021-04-10	11.9	0
2021-04-11	9.9	2.6
2021-04-12	5.4	5
2021-04-13	4.2	0
2021-04-14	7.8	0
2021-04-15	6.7	0
2021-04-16	3.7	0
2021-04-17	4.8	0
2021-04-18	11.3	0
2021-04-19	14.4	0
2021-04-20	16.7	0
2021-04-21	17.4	0
2021-04-22	14.8	0.9
2021-04-23	17.5	0
2021-04-24	18.1	0
2021-04-25	11.3	1.2
2021-04-26	10.5	0
2021-04-27	7.6	0
2021-04-28	8.8	0
2021-04-29	10.5	0
2021-04-30	11.2	0
2021-05-01	13	0
2021-05-02	15.8	0
2021-05-03	13.7	0
2021-05-04	10.9	0
2021-05-05	14.6	0
2021-05-06	9.4	0
2021-05-07	14.3	0
2021-05-08	18	0
2021-05-09	18.1	0
2021-05-10	17.8	0
2021-05-11	18.8	0
2021-05-12	20	0
2021-05-13	21.2	0
2021-05-14	19.2	7
2021-05-15	11.7	0
2021-05-16	13.6	0
2021-05-17	16.7	0
2021-05-18	17.8	0
2021-05-19	16.8	0
2021-05-20	16.9	0
2021-05-21	21	0
2021-05-22	17.9	0
2021-05-23	13.9	0
2021-05-24	11.5	0
2021-05-25	17.6	0
2021-05-26	17.2	0
2021-05-27	15.9	0
2021-05-28	19.6	0
2021-05-29	22.9	0
2021-05-30	22.2	0
2021-05-31	21	0.2
2021-06-01	19.5	0
2021-06-02	15.8	0
2021-06-03	15.5	0
2021-06-04	21.2	0
2021-06-05	21.1	0
2021-06-06	23.8	0
2021-06-07	25.2	0
2021-06-08	20.7	0.4
2021-06-09	19.1	0
2021-06-10	20.1	0
2021-06-11	22.7	0
2021-06-12	24.2	0
2021-06-13	21.3	28.7
2021-06-14	23.9	2.9
2021-06-15	25.1	0
2021-06-16	19.6	22
2021-06-17	19.8	0
2021-06-18	21	0
2021-06-19	22.1	0
2021-06-20	21.9	0
2021-06-21	25.3	0
2021-06-22	25.3	0
2021-06-23	23.5	3.2
2021-06-24	17.6	23.7
2021-06-25	21.2	0.1
2021-06-26	25.4	0
2021-06-27	26.5	0
2021-06-28	25.8	0.5
2021-06-29	24.3	0.5
2021-06-30	25.5	0
2021-07-01	24.2	0
2021-07-02	20	2.1
2021-07-03	21.2	0.9
2021-07-04	21.9	2.2
2021-07-05	23.3	2.4
2021-07-06	22.9	0
2021-07-07	24.3	0
2021-07-08	23.6	5.7
2021-07-09	24.3	0
2021-07-10	27.4	0
2021-07-11	26.6	0
2021-07-12	23.9	1.1
2021-07-13	25.7	0
2021-07-14	28	0
2021-07-15	27.2	7.2
2021-07-16	24.9	0.4
2021-07-17	24	0.3
2021-07-18	25.9	0
2021-07-19	26.4	0
2021-07-20	26.3	0
2021-07-21	25	0
2021-07-22	24.7	0
2021-07-23	24.7	0
2021-07-24	25.8	0
2021-07-25	23	8.4
2021-07-26	23.3	19.2
2021-07-27	22.6	9.1
2021-07-28	21.1	1.2
2021-07-29	23.4	0
2021-07-30	25.1	0
2021-07-31	26.1	0
2021-08-01	22.5	0
2021-08-02	21.4	0
2021-08-03	20.4	4.7
2021-08-04	21.5	0
2021-08-05	21.9	0
2021-08-06	21.6	0
2021-08-07	23	0
2021-08-08	21.8	0.2
2021-08-09	22.5	3.2
2021-08-10	21.6	0
2021-08-11	22.5	0
2021-08-12	21.8	0
2021-08-13	23.1	0
2021-08-14	21.3	24.4
2021-08-15	20.3	0.1
2021-08-16	22.9	0
2021-08-17	24.1	0
2021-08-18	20.6	47.2
2021-08-19	21	6.5
2021-08-20	21.1	0.1
2021-08-21	21	0
2021-08-22	21.6	0
2021-08-23	15.6	3.4
2021-08-24	14.9	0.3
2021-08-25	16	0
2021-08-26	17.3	0
2021-08-27	16.6	0
2021-08-28	17.3	0.8
2021-08-29	19	0
2021-08-30	18.8	0
2021-08-31	20.4	0.2
2021-09-01	20.2	0
2021-09-02	19.8	5.8
2021-09-03	21.9	0
2021-09-04	17.4	0.4
2021-09-05	16.1	0
2021-09-06	16.6	0.3
2021-09-07	17.9	0
2021-09-08	19.5	0
2021-09-09	20.5	0
2021-09-10	20.1	0
2021-09-11	21.1	0
2021-09-12	22.4	0.2
2021-09-13	22	0
2021-09-14	21.4	1.3
2021-09-15	17.2	10.7
2021-09-16	17.1	0.1
2021-09-17	16.5	0
2021-09-18	16.8	0
2021-09-19	16.1	0
2021-09-20	16.7	0.5
2021-09-21	16.4	0
2021-09-22	18.6	0
2021-09-23	18.7	0
2021-09-24	17.5	0
2021-09-25	18.6	0
2021-09-26	17.5	0
2021-09-27	14.7	0
2021-09-28	16.6	6.9
2021-09-29	16.6	0
2021-09-30	18.1	0
2021-10-01	13.4	0
2021-10-02	17	0
2021-10-03	17	0
2021-10-04	11	0
2021-10-05	10.1	0
2021-10-06	9.8	0
2021-10-07	11.1	0
2021-10-08	10.7	0
2021-10-09	9.9	0
2021-10-10	6	0
2021-10-11	6.1	0
2021-10-12	7.7	0.4
2021-10-13	10.2	6.4
2021-10-14	10.2	4.5
2021-10-15	7.9	0
2021-10-16	1.5	0
2021-10-17	2.5	0
2021-10-18	6.5	0
2021-10-19	3.5	0
2021-10-20	5	0
2021-10-21	4.2	0
2021-10-22	3.7	0
2021-10-23	5	0
2021-10-24	7.7	0
2021-10-25	7.2	0
2021-10-26	7.8	0
2021-10-27	5.7	0
2021-10-28	7.5	0
2021-10-29	6.2	0
2021-10-30	5.7	0
2021-10-31	3	0
2021-11-01	2.6	0
2021-11-02	5.4	0
2021-11-03	4.4	0
2021-11-04	5.8	0
2021-11-05	8.9	0
2021-11-06	-3.2	0.8
2021-11-07	-7	0
2021-11-08	-8.2	0
2021-11-09	-4.4	0
2021-11-10	-0.9	0
2021-11-11	-0.2	0
2021-11-12	-1.4	0
2021-11-13	-2.2	0
2021-11-14	-1.7	0
2021-11-15	-1	0
2021-11-16	-0.3	0
2021-11-17	0.2	0
2021-11-18	1.5	0
2021-11-19	0.3	0
2021-11-20	1	0
2021-11-21	-4.3	0
2021-11-22	-8.5	0
2021-11-23	-7.2	0
2021-11-24	-5.7	0
2021-11-25	-3.3	0
2021-11-26	-2.9	0
2021-11-27	0.6	0.1
2021-11-28	2.5	0
2021-11-29	-1.1	0
2021-11-30	-5.3	0
2021-12-01	-6.5	0
2021-12-02	-5.1	0
2021-12-03	-3.8	0
2021-12-04	-4.7	0
2021-12-05	-3.9	0
2021-12-06	-2.2	0
2021-12-07	-2.4	0
2021-12-08	-0.5	1.2
2021-12-09	-4.3	0
2021-12-10	-4.4	0
2021-12-11	-4.5	0
2021-12-12	-9.8	0
2021-12-13	-9.6	0
2021-12-14	-9.4	0
2021-12-15	-6	0
2021-12-16	-6.9	0
2021-12-17	-14.3	0
2021-12-18	-10.1	0
2021-12-19	-7.9	0
2021-12-20	-6.4	0
2021-12-21	-5	0
2021-12-22	-5.4	0
2021-12-23	-6.5	0
2021-12-24	-12.5	0
2021-12-25	-16.7	0
2021-12-26	-17.3	0
2021-12-27	-14.7	0
2021-12-28	-14.3	0
2021-12-29	-12.2	0
2021-12-30	-10.5	0
2021-12-31	-10.3	0
